# Supplementary material
Source: PubMed Central journal article supplement (PMC5467130)
Supplement: Supp_Table1.pdf [file Supp_Table1.pdf]

## Supplementary Data

SUPPLEMENTARY TABLE S1. FULL ADJUSTED LOGISTIC REGRESSION MODELS OF UNMET INFORMATION AND SERVICE NEEDS AMONG ADOLESCENT AND YOUNG ADULT SURVIVORS (N=1395)

|                                            | <i>Unmet needs</i>                  |                              |                            |                                       |
|--------------------------------------------|-------------------------------------|------------------------------|----------------------------|---------------------------------------|
|                                            | <i>Late effects information</i>     | <i>Fertility information</i> | <i>Recurrence concerns</i> | <i>Family risk of cancer concerns</i> |
|                                            | <i>OR (95% CI)</i>                  |                              |                            |                                       |
| Survivorship care planning                 |                                     |                              |                            |                                       |
| Receipt of written treatment summary       | <b>0.51 (0.37–0.71)<sup>a</sup></b> | 0.81 (0.60–1.08)             | <b>0.55 (0.39–0.79)</b>    | 0.90 (0.66–1.21)                      |
| Receipt of instructions for follow-up care | <b>0.29 (0.15–0.58)</b>             | <b>0.62 (0.42–0.91)</b>      | 0.61 (0.36–1.02)           | 0.72 (0.48–1.08)                      |
| Sociodemographics                          |                                     |                              |                            |                                       |
| Age at time of survey                      | 1.01 (0.99–1.04)                    | 0.98 (0.96–1.00)             | <b>0.98 (0.96–1.00)</b>    | 1.00 (0.98–1.02)                      |
| Female                                     | <b>2.03 (1.35–3.06)</b>             | <b>2.46 (1.70–3.56)</b>      | <b>1.55 (1.02–2.34)</b>    | <b>1.70 (1.18–2.43)</b>               |
| Race                                       |                                     |                              |                            |                                       |
| White                                      | 1.47 (0.94–2.30)                    | 0.88 (0.59–1.34)             | 1.08 (0.65–1.80)           | 0.73 (0.47–1.11)                      |
| Other                                      | Reference                           | Reference                    | Reference                  | Reference                             |
| Level of education                         |                                     |                              |                            |                                       |
| HS diploma or less                         | 0.83 (0.42–1.63)                    | <b>0.37 (0.20–0.66)</b>      | 1.09 (0.51–2.31)           | <b>1.90 (1.04–3.46)</b>               |
| Technical/community/some college           | 0.69 (0.45–1.07)                    | 0.74 (0.52–1.05)             | 0.73 (0.47–1.14)           | <b>1.70 (1.18–2.44)</b>               |
| Bachelor's degree                          | 0.73 (0.47–1.13)                    | 0.87 (0.61–1.25)             | 0.73 (0.47–1.15)           | 1.20 (0.83–1.74)                      |
| Graduate/medical degree                    | Reference                           | Reference                    | Reference                  | Reference                             |
| Marital status                             |                                     |                              |                            |                                       |
| Married/domestic partner                   | 1.10 (0.79–1.53)                    | <b>0.69 (0.52–0.92)</b>      | 1.04 (0.74–1.47)           | <b>1.57 (1.17–2.10)</b>               |
| Other                                      | Reference                           | Reference                    | Reference                  | Reference                             |
| Employment status                          |                                     |                              |                            |                                       |
| Employed (full or part-time)               | 1.11 (0.75–1.63)                    | 0.94 (0.67–1.31)             | <b>1.52 (1.03–2.23)</b>    | 1.26 (0.90–1.76)                      |
| Not employed                               | Reference                           | Reference                    | Reference                  | Reference                             |
| Cancer history                             |                                     |                              |                            |                                       |
| Age at cancer diagnosis (years)            |                                     |                              |                            |                                       |
| 15–20                                      | 1.64 (0.83–3.21)                    | <b>1.93 (1.14–3.27)</b>      | 0.86 (0.45–1.54)           | 0.82 (0.48–1.41)                      |
| 21–29                                      | 1.27 (0.85–1.88)                    | <b>1.84 (1.33–2.56)</b>      | 1.10 (0.74–1.64)           | 1.17 (0.84–1.64)                      |
| 30–39                                      | Reference                           | Reference                    | Reference                  | Reference                             |
| Type of cancer                             |                                     |                              |                            |                                       |
| Breast                                     | Reference                           | Reference                    | Reference                  | Reference                             |
| Colorectal                                 | 1.51 (0.58–3.99)                    | 1.69 (0.76–3.76)             | 4.04 (0.87–18.84)          | 1.89 (0.78–4.58)                      |
| Leukemia                                   | 1.39 (0.49–3.99)                    | 1.21 (0.52–2.78)             | 0.55 (0.21–1.46)           | <b>0.17 (0.07–0.45)</b>               |
| Lymphoma                                   | 1.32 (0.72–2.43)                    | <b>1.83 (1.11–3.00)</b>      | 1.17 (0.62–2.19)           | <b>0.57 (0.34–0.96)</b>               |
| Melanoma                                   | 0.83 (0.38–1.82)                    | <b>0.20 (0.09–0.46)</b>      | 1.14 (0.48–2.71)           | 0.86 (0.43–1.74)                      |
| Sarcoma                                    | 2.69 (0.99–7.35)                    | 1.02 (0.51–2.03)             | 1.09 (0.46–2.58)           | 0.49 (0.23–1.00)                      |
| Testicular                                 | 1.13 (0.57–2.23)                    | <b>2.34 (1.30–4.19)</b>      | 1.31 (0.64–2.69)           | 0.82 (0.45–1.51)                      |
| Thyroid                                    | 2.01 (0.78–5.17)                    | 0.58 (0.30–1.14)             | 0.75 (0.34–1.66)           | 1.27 (0.62–2.62)                      |
| Other                                      | 1.20 (0.68–2.12)                    | 0.82 (0.52–1.29)             | 0.83 (0.47–1.48)           | <b>0.55 (0.34–0.89)</b>               |
| Time since last treatment                  |                                     |                              |                            |                                       |
| Less than 5 years                          | Reference                           | Reference                    | Reference                  | Reference                             |
| 5 years or more                            | 0.88 (0.60–1.30)                    | 1.27 (0.92–1.76)             | 0.69 (0.47–1.02)           | 1.04 (0.75–1.45)                      |
| Currently seeing an oncologist             | 0.82 (0.57–1.18)                    | <b>1.49 (1.10–2.03)</b>      | 1.00 (0.69–1.45)           | 1.10 (0.81–1.51)                      |
| Currently seeing a primary care physician  | 1.03 (0.73–1.45)                    | 1.06 (0.80–1.44)             | <b>0.68 (0.47–0.99)</b>    | 1.26 (0.93–1.71)                      |

<sup>a</sup>Values depicted in bold text are statistically significant at  $p < 0.05$ . CI, confidence interval; SD, standard deviation.
